# Supplementary material for: Modelling the Brumadinho tailings dam failure, the subsequent loss of life and how it could have been reduced
Source: Copernicus journal article supplement (doi:10.5194/nhess-21-21-2021), 2021-01-07
Supplement: Supplementary file 1 [file nhess-21-21-2021-supplement.zip]

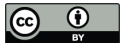

## *Supplement of*

# **Modelling the Brumadinho tailings dam failure, the subsequent loss of life and how it could have been reduced**

**Darren Lumbroso et al.**

*Correspondence to:* Darren Lumbroso (d.lumbroso@hrwallingford.com)

- nhess-21-21-2021-supplement-title-page.pdf
- Brumadinho\_no\_warning.mp4
- Brumadinho\_warning\_at\_-5\_minutes.mp4
- Brumadinho\_warning\_at\_0\_minutes.mp4
- Buildings\_wgs84z23s.dbf
- Buildings\_wgs84z23s.prj
- Buildings\_wgs84z23s.sbn
- Buildings\_wgs84z23s.sbx
- Buildings\_wgs84z23s.shp
- Buildings\_wgs84z23s.shx
- Modelled\_FloodExtent\_wgs84z23.dbf
- Modelled\_FloodExtent\_wgs84z23.prj
- Modelled\_FloodExtent\_wgs84z23.sbn
- Modelled\_FloodExtent\_wgs84z23.sbx
- Modelled\_FloodExtent\_wgs84z23.shp
- Modelled\_FloodExtent\_wgs84z23.shx
- Modelled\_FloodExtent\_wgs84z23.xml
- Observed\_FloodExtent\_wgs84z23s.dbf
- Observed\_FloodExtent\_wgs84z23s.prj
- Observed\_FloodExtent\_wgs84z23s.sbn

- Observed\_FloodExtent\_wgs84z23s.sbx
- Observed\_FloodExtent\_wgs84z23s.shp
- Observed\_FloodExtent\_wgs84z23s.shx
- Observed\_FloodExtent\_wgs84z23s.xml
- Roads\_wgs84z23s.dbf
- Roads\_wgs84z23s.prj
- Roads\_wgs84z23s.sbn
- Roads\_wgs84z23s.sbx
- Roads\_wgs84z23s.shp
- Roads\_wgs84z23s.shx
- Roads\_wgs84z23s.xml
- Tailings\_Reservoir\_wgs84z23s.dbf
- Tailings\_Reservoir\_wgs84z23s.prj
- Tailings\_Reservoir\_wgs84z23s.sbn
- Tailings\_Reservoir\_wgs84z23s.sbx
- Tailings\_Reservoir\_wgs84z23s.shp
- Tailings\_Reservoir\_wgs84z23s.shx
- Tailings\_Reservoir\_wgs84z23s.xml

The copyright of individual parts of the supplement might differ from the CC BY 4.0 License.
